# Supplementary material for: Genetic Landscape of Common Epilepsies: Advancing towards Precision in Treatment
Source: PubMed Central journal article supplement (PMC7589654; doi:10.3390/ijms21207784), 2020-10-21
Supplement: ijms-21-07784-s001.pdf [file ijms-21-07784-s001.pdf]

Supplementary data

Table S1: List of gene panels used for epilepsy diagnosis in different companies.

| Sl. No. | Company Name (Country of origin) | Phenotype Diagnosed               | Gene Panel                                                                                                                                                                                                                                                                                                                                                                                                                                                                                                                                                                                                                                                                                                                                                                                                                                                                                                                                                                                                                                                                                                                                                                                                                                                                                                                                                                                                                                                                                                                                                                                                                                                                                                                                                                                                                                                               |
|---------|----------------------------------|-----------------------------------|--------------------------------------------------------------------------------------------------------------------------------------------------------------------------------------------------------------------------------------------------------------------------------------------------------------------------------------------------------------------------------------------------------------------------------------------------------------------------------------------------------------------------------------------------------------------------------------------------------------------------------------------------------------------------------------------------------------------------------------------------------------------------------------------------------------------------------------------------------------------------------------------------------------------------------------------------------------------------------------------------------------------------------------------------------------------------------------------------------------------------------------------------------------------------------------------------------------------------------------------------------------------------------------------------------------------------------------------------------------------------------------------------------------------------------------------------------------------------------------------------------------------------------------------------------------------------------------------------------------------------------------------------------------------------------------------------------------------------------------------------------------------------------------------------------------------------------------------------------------------------|
| 1       | Athena Diagnostics Inc (US)      | Epilepsy                          | ALDH7A1, CACNA1A, CASR, CHRNA2, CHRNA4, CHRN2, CSTB, DEPDC5, EFHC1, EPM2A, GABRA1, GABRB3, GABRD, GABRG2, GRIN2A, KCNA1, KCNQ2, KCNQ3, KCNT1, KCTD7, LGI1, MBD5, NHLRC1, PCDH19, PRICKLE1, PRICKLE2, PRRT2, SCARB2, SCN1A, SCN1B, SCN2A, SCN9A, SLC2A1, SLC4A10, TBC1D24, ABAT, ADSL, ALG13, ALG9, AMT, ASAH1, ASPM, ATP1A3, BCKDK, BRAT1, CACNA1H, CACNB4, CHD2, CHRNA7, CPA6, CRH, CYP27A1, DYNC1H1, FOLR1, GABRB2, GAMT, GATM, GLDC, GOSR2, GRIN2B, HCN1, HCN4, KCNC1, KCNH2, L2HGDH, LIAS, LMNB2, NDUFA1, PHGDH, PIGO, PNPO, PRIMA1, SCN3A, SCN5A, SLC19A3, SLC25A19, SLC35A2, SLC6A1, SLC6A8, ST3GAL5, STX1B, SUCLA2, SYNJ1, ALPL, ARHGEF2, ARHGEF9, ATP2A2, ATP6AP2, ATP6V0A2, ATRX, CASK, CHRNA4, CLN3, CLN5, CLN6, CLN8, CPT2, CTSD, CUL4B, DCX, DNAJC5, EMX2, FGD1, FGFR3, FLNA, GPC3, GPR56, GRIA3, LAMA2, LARGE1, LBR, MFSD8, NIPBL, NRXN1, OFD1, OPHN1, PAFAH1B1, PAK3, PANK2, PAX6, PEX7, PHF6, PIGV, PLA2G6, PNKP, PPT1, PQBP1, RAB39B, RAB3GAP1, RAI1, RELN, RNASEH2A, RNASEH2B, RNASEH2C, SAMHD1, SCARB2, SCN2A, SCN8A, SERPINI1, SETBP1, SLC25A22, SLC9A6, SMC1A, SMC3, SMS, SPTAN1, SRPX2, STXBP1, SYP, TBX1, TCF4, TPP1, TREX1, TUBA1A, TUBA8, TUBB2B, UBE3A, VPS13A, ZEB2, ARX, ATP1A2, CACNA1A, COL4A1, NOTCH3, CASR, CDKL5, VPS13B, CNTNAP2, CSTB, FKTN, FKR1, FOXG1, MECP2, MEF2C, PLP1, POLG, POMT1, POMT2, POMGNT1, SYNGAP1, TSC1, TSC2, WDR62, GFAP, MCPH1, ADGRV1, ALG13, ANKRD11, ATP13A2, ATP1A3, CACNA2D1, CACNA2D2, CENPJ, CHD2, CHRNA7, CTSF, DEAF1, DNMT1, DOCK7, DPYD, DYRK1A, EEF1A2, GABRB2, GLDC, GNAO1, GOSR2, GRIN1, GRIN2B, GRN, HCN1, HCN4, HNRNPU, HPRT1, IQSEC2, KANSL1, KCNA2, KCNB1, KCNC1, KCNH2, KCNJ11, KIAA2022, L2HGDH, LIAS, LMNB2, MAGI2, NDE1, NDUFA1, NR2F1, PIGA, PIGN, PIGO, PLCB1, PURA, QARS, RFXO1, ROGDI, SETD2, SHH, SIK1, SIX3, SLC13A5, SNAP25, SPATA5, ST3GAL3, STIL, SYN1, SZT2, TBL1XR1, TSEN54, WDR45 |
| 2       | Blueprint Genetics (Finland)     | Juvenile myoclonic epilepsy (JME) | GABRA1, EFHC1                                                                                                                                                                                                                                                                                                                                                                                                                                                                                                                                                                                                                                                                                                                                                                                                                                                                                                                                                                                                                                                                                                                                                                                                                                                                                                                                                                                                                                                                                                                                                                                                                                                                                                                                                                                                                                                            |
|         |                                  | Childhood absence epilepsy        | CACNA1H, GABRB3, GABRG2                                                                                                                                                                                                                                                                                                                                                                                                                                                                                                                                                                                                                                                                                                                                                                                                                                                                                                                                                                                                                                                                                                                                                                                                                                                                                                                                                                                                                                                                                                                                                                                                                                                                                                                                                                                                                                                  |
|         |                                  | Familial temporal lobe epilepsy   | LGI1, RELN, GAL, CPA6, MICAL1                                                                                                                                                                                                                                                                                                                                                                                                                                                                                                                                                                                                                                                                                                                                                                                                                                                                                                                                                                                                                                                                                                                                                                                                                                                                                                                                                                                                                                                                                                                                                                                                                                                                                                                                                                                                                                            |
|         |                                  | Genetic generalized epilepsy      | SLC2A1, CACNB4                                                                                                                                                                                                                                                                                                                                                                                                                                                                                                                                                                                                                                                                                                                                                                                                                                                                                                                                                                                                                                                                                                                                                                                                                                                                                                                                                                                                                                                                                                                                                                                                                                                                                                                                                                                                                                                           |
| 3       | Emory Genetics Laboratory (US)   | Epilepsy                          | CLCN2, EFHC1, GABRA1, GABRB3, GABRG2, GRIN2A, KCNC1, RELN, ABAT, CENPJ, DNAJC5, GRIN2A, MBD5, PLCB1, SCN8A, STXBP1, ADSL, CHRNA2, EFHC1, HCN1, MCPH1, PNKP, SCN9A, SYN1, ALDH7A1, CHRNA4, EMX2, HCN4, MECP2, PNPO, SHH, TBC1D24, ARHGEF9, CHRN2, EPM2A, KCNA1, MEF2C, POLG, SIX3, TCF4, ARX, CLN3, FLNA, KCNJ10, MFSD8, PPT1, SLC19A3, TPP1                                                                                                                                                                                                                                                                                                                                                                                                                                                                                                                                                                                                                                                                                                                                                                                                                                                                                                                                                                                                                                                                                                                                                                                                                                                                                                                                                                                                                                                                                                                              |

|   |                                   |                                   |                                                                                                                                                                                                                                                                                                                                                                                                                                                                                                                                                                                                                                                                                                                                                                                                                                                                                                                                                                                                                                                                                                                                                                                                                                                                                                                                                                                                                                            |
|---|-----------------------------------|-----------------------------------|--------------------------------------------------------------------------------------------------------------------------------------------------------------------------------------------------------------------------------------------------------------------------------------------------------------------------------------------------------------------------------------------------------------------------------------------------------------------------------------------------------------------------------------------------------------------------------------------------------------------------------------------------------------------------------------------------------------------------------------------------------------------------------------------------------------------------------------------------------------------------------------------------------------------------------------------------------------------------------------------------------------------------------------------------------------------------------------------------------------------------------------------------------------------------------------------------------------------------------------------------------------------------------------------------------------------------------------------------------------------------------------------------------------------------------------------|
|   |                                   |                                   | <p><i>ASPM CLN5 FOLR1 KCN11 MTHFR PRICKLE1 SLC25A19 TSC1 ATP1A2 CLN6 FOXG1 KCNMA1 NDE1 PRICKLE2 SLC25A22 TSC2 ATP6AP2 CLN8 GABRA1 KCNQ2 NDUFA1 PRRT2 SLC2A1 TSEN54 BCKDK CNTNAP2 GABRG2 KCNQ3 NHLRC1 RELN SLC9A6 UBE3A CACNA1A CPA6 GAMT KCNT1 NRXN1 SCARB2 SPTAN1 WDR62 CACNB4 CSTB GATM KCTD7 OPHN1 SCN1A SRPX2 ZEB2 CASK CTSD GOSR2 LGI1 PAFAH1B1 SCN1B ST3GAL3 CASR CYP27A1 GPR56 LIAS PCDH19 SCN2A ST3GAL5 CDKL5 DCX GPR98 MAGI2 PHF6 SCN3A STIL</i></p>                                                                                                                                                                                                                                                                                                                                                                                                                                                                                                                                                                                                                                                                                                                                                                                                                                                                                                                                                                              |
| 4 | Eurofin Clinical Genetics (India) | Epilepsy                          | <p><i>ABAT, ADGRG1, ADGRV1, ADSL, ALDH5A1, ALDH7A1, ARHGEF9, ARX, ASPM, ATP1A2, ATP6AP2, BCKDK, CACNA1A, CACNB4, CASK, CASR, CDKL5, CENPJ, CHRNA2, CHRNA4, CHRN2, CLN3, CLN5, CLN6, CLN8, CNTNAP2, CPA6, CSTB, CTSD, CYP27A1, DCX, DNAJC5, EFHC1, EMX2, EPM2A, FLNA, FOLR1, FOXG1, GABRA1, GABRG2, GAMT, GATM, GOSR2, GRIN2A, HCN1, HCN4, KCNA1, KCN10, KCN11, KCNMA1, KCNQ2, KCNQ3, KCNT1, KCTD7, LGI1, LIAS, MAGI2, MBD5, MCPH1, MECP2, MEF2C, MFSD8, MTHFR, NDE1, NDUFA1, NHLRC1, NRXN1, OPHN1, PAFAH1B1, PCDH19, PHF6, PLCB1, PNKP, PNPO, POLG, PPT1, PRICKLE1, PRICKLE2, PRRT2, RELN, SCARB2, SCN1A, SCN1B, SCN2A, SCN3A, SCN8A, SCN9A, SHH, SIX3, SLC19A3, SLC25A19, SLC25A22, SLC2A1, SLC9A6, SPTAN1, SRPX2, ST3GAL3, ST3GAL5, STIL, STXBP1, SYN1, TBC1D24, TCF4, TPP1, TSC1, TSC2, TSEN54, UBE3A, WDR62, ZEB2</i></p>                                                                                                                                                                                                                                                                                                                                                                                                                                                                                                                                                                                                              |
| 5 | Gene Dx (USA)                     | Juvenile myoclonic epilepsy (JME) | <p><i>CACNB4, EFHC1, GABRA1, CILK</i></p>                                                                                                                                                                                                                                                                                                                                                                                                                                                                                                                                                                                                                                                                                                                                                                                                                                                                                                                                                                                                                                                                                                                                                                                                                                                                                                                                                                                                  |
| 6 | Invitae (USA)                     | Epilepsy                          | <p><i>ADSL, ALDH5A1, ALDH7A1, ALG13, ARG1, ARHGEF9, ARX, ATP1A2, ATP1A3, ATRX, BRAT1, C12orf57, CACNA1A, CACNA2D2, CARS2, CASK, CDKL5, CHD2, CHRNA2, CHRNA4, CHRN2, CLCN4, CLN2, (TPP1), CLN3, CLN5, CLN6, CLN8, CNTNAP2, CSTB, CTSD, DDC, DEPDC5, DNAJC5, DNMI1, DOCK7, DYRK1A, EEF1A2, EFHC1, EHMT1, EPM2A, FARS2, FOLR1, FOXG1, FRRS1L, GABBR2, GABRA1, GABRB2, GABRB3, GABRG2, GAMT, GATM, GLRA1, GNAO1, GOSR2, GRIN1, GRIN2A, GRIN2B, HCN1, HNRNPU, IER3IP1, IQSEC2, ITPA, JMJD1C, KANSL1, KCNA2, KCNB1, KCNC1, KCNH2, KCN10, KCNMA1, KCNQ2, KCNQ3, KCNT1, KCTD7, LGI1, LIAS, MBD5, MECP2, MEF2C, MFSD8, MOCS1, MOCS2, MTOR, NEDD4L, NEXMIF, NGLY1, NHLRC1, NPRL3, NRXN1, PACS1, PCDH19, PIGA, PIGN, PIGO, PLCB1, PNKD, PNKP, PNPO, POLG, PPT1, PRICKLE1, PRIMA1, PRRT2, PURA, QARS, RELN, ROGDI, SATB2, SCARB2, SCN1A, SCN1B, SCN2A, SCN3A, SCN8A, SCN9A, SERPINI1, SGCE, SIK1, SLC12A5, SLC13A5, SLC19A3, SLC25A12, SLC25A22, SLC2A1, SLC35A2, SLC6A1, SLC6A8, SLC9A6, SMC1A, SNX27, SPATA5, SPTAN1, ST3GAL5, STRADA, STX1, B, STXBP1, SUOX, SYN1, SYNGAP1, SYNJ1, SZT2, TBC1D24, TCF4, TPK1, TSC1, TSC2, UBE3A, WDR45, WWOX, ZDHHC9, ZEB2, ABAT, ARHGEF15, ATP6AP2, CACNA1H, CACNB4, CASR, CERS1, CNTN2, CPA6, DIAPH1, FASN, GABRD, GAL, GPHN, KCNA1, KCND2, KCNH5, KPNA7, LMNB2, NECAP1, PIGG, PIGQ, PIK3AP1, PRDM8, PRICKLE2, RFXO1, RFXO3, RYR3, SCN5A, SETD2, SLC35A3, SNAP25, SRPX2, ST3GAL3, TBL1XR, AMT, GCSH, GLDC</i></p> |

**Table S2: List of available genes used for genetic diagnosis of rare epilepsies.**

| Sr. No. | Gene           | Phenotype                                  |
|---------|----------------|--------------------------------------------|
| 1       | <i>ALDH7A1</i> | Pyridoxine-dependent epilepsy              |
| 2       | <i>BRAT1</i>   | EE                                         |
| 3       | <i>DEPDC5</i>  | Tuberous sclerosis complex, focal epilepsy |
| 4       | <i>DNM1</i>    | EIEE                                       |

|    |                |                                                                                                                                                                                                                                   |
|----|----------------|-----------------------------------------------------------------------------------------------------------------------------------------------------------------------------------------------------------------------------------|
| 5  | <i>DOLK</i>    | Congenital disorder of glycosylation, type Im                                                                                                                                                                                     |
| 6  | <i>FOLR1</i>   | Folinic acid-responsive seizures                                                                                                                                                                                                  |
| 7  | <i>FOXG1</i>   | West syndrome                                                                                                                                                                                                                     |
| 8  | <i>GABRG2</i>  | Childhood absence epilepsy, GEFS+, FS, EIEE                                                                                                                                                                                       |
| 9  | <i>GAMT</i>    | Creatine deficiency syndrome 2                                                                                                                                                                                                    |
| 10 | <i>GATM</i>    | Creatine deficiency syndrome 3                                                                                                                                                                                                    |
| 11 | <i>GNAO1</i>   | EIEE                                                                                                                                                                                                                              |
| 12 | <i>GRIN2A</i>  | Focal epilepsy and speech disorder with/without mental retardation                                                                                                                                                                |
| 13 | <i>GRIN2D</i>  | EIEE                                                                                                                                                                                                                              |
| 14 | <i>HCN1</i>    | EIEE, GEFS+                                                                                                                                                                                                                       |
| 15 | <i>KCNMA1</i>  | Paroxysmal non-kinesigenic dyskinesia, with or without generalized epilepsy, idiopathic generalized epilepsy                                                                                                                      |
| 16 | <i>KCNQ2</i>   | EIEE, benign familial neonatal seizures                                                                                                                                                                                           |
| 17 | <i>KCNQ3</i>   | EIEE, benign familial neonatal seizures                                                                                                                                                                                           |
| 18 | <i>KCNT1</i>   | Autosomal dominant nocturnal frontal lobe epilepsy, epilepsy of infancy with migrating focal seizures                                                                                                                             |
| 19 | <i>MEF2C</i>   | West syndrome                                                                                                                                                                                                                     |
| 20 | <i>PCDH19</i>  | Dravet syndrome-like EIEE/Juberg–Hellman syndrome                                                                                                                                                                                 |
| 21 | <i>PNPO</i>    | Pyridoxal 5'-phosphate responsive epilepsy                                                                                                                                                                                        |
| 22 | <i>SCN1A</i>   | Dravet syndrome; GEFS+                                                                                                                                                                                                            |
| 23 | <i>SCN2A</i>   | EIEE, infantile epilepsy with migrating focal seizures, West syndrome, Ohtahara syndrome, BFINS                                                                                                                                   |
| 24 | <i>SCN8A</i>   | EIEE                                                                                                                                                                                                                              |
| 25 | <i>SLC2A1</i>  | Glut-1 deficiency                                                                                                                                                                                                                 |
| 26 | <i>SLC35A2</i> | Congenital disorder of glycosylation, type IIm                                                                                                                                                                                    |
| 27 | <i>AMACR</i>   | Alpha-methylacyl-CoA racemase deficiency, bile acid synthesis defect                                                                                                                                                              |
| 28 | <i>CACNB4</i>  | Episodic ataxia, epilepsy, idiopathic generalized, susceptibility to, 9                                                                                                                                                           |
| 29 | <i>CASR</i>    | Hypocalcemia, neonatal hyperparathyroidism, familial hypocalciuric hypercalcemia with transient neonatal hyperparathyroidism                                                                                                      |
| 30 | <i>CHRNA2</i>  | Epilepsy, nocturnal frontal lobe                                                                                                                                                                                                  |
| 31 | <i>CHRNA4</i>  | Epilepsy, nocturnal frontal lobe                                                                                                                                                                                                  |
| 32 | <i>CHRN2</i>   | Epilepsy, nocturnal frontal lobe                                                                                                                                                                                                  |
| 33 | <i>CLCN2</i>   | Leukoencephalopathy with ataxia, epilepsy                                                                                                                                                                                         |
| 34 | <i>EFHC1</i>   | Epilepsy, myoclonic juvenile, epilepsy, severe intractable, epilepsy, juvenile absence                                                                                                                                            |
| 35 | <i>GABRA1</i>  | Epileptic encephalopathy, early infantile, epilepsy, childhood absence, epilepsy, juvenile myoclonic                                                                                                                              |
| 36 | <i>GRIN2A</i>  | Epilepsy, focal, with speech disorder                                                                                                                                                                                             |
| 37 | <i>KCNA1</i>   | Episodic ataxia/myokymia syndrome                                                                                                                                                                                                 |
| 38 | <i>KCNC1</i>   | Epilepsy, progressive myoclonic                                                                                                                                                                                                   |
| 39 | <i>KCNQ2</i>   | Epileptic encephalopathy, early infantile, benign familial neonatal seizures, myokymia                                                                                                                                            |
| 40 | <i>MTOR</i>    | Smith–Kingsmore syndrome                                                                                                                                                                                                          |
| 41 | <i>NPRL3</i>   | Epilepsy, familial focal, with variable foci 3                                                                                                                                                                                    |
| 42 | <i>POLG</i>    | POLG-related ataxia neuropathy spectrum disorders, Sensory ataxia, dysarthria, and ophthalmoparesis, Alpers syndrome, progressive external ophthalmoplegia with mitochondrial DNA deletions, mitochondrial DNA depletion syndrome |
| 43 | <i>PRRT2</i>   | Episodic kinesigenic dyskinesia, seizures, benign familial infantile, 2, convulsions, familial infantile, with paroxysmal choreoathetosis                                                                                         |
| 44 | <i>RELN</i>    | Lissencephaly, epilepsy, familial temporal lobe                                                                                                                                                                                   |
| 45 | <i>SCN1B</i>   | Atrial fibrillation, Brugada syndrome, generalized epilepsy with febrile seizures plus, epilepsy, generalized, with febrile seizures plus, type 1, epileptic encephalopathy, early infantile, 52                                  |
| 46 | <i>SCN9A</i>   | Paroxysmal extreme pain disorder, small fiber neuropathy, Erythralgia, primary, generalized epilepsy with febrile seizures plus, type 7, insensitivity to pain, congenital, autosomal recessive                                   |
| 47 | <i>SLC6A1</i>  | Myoclonic-astatic epilepsy                                                                                                                                                                                                        |

---

|    |                |                                                                                                                                                                                                                                                        |
|----|----------------|--------------------------------------------------------------------------------------------------------------------------------------------------------------------------------------------------------------------------------------------------------|
| 48 | <i>TBC1D24</i> | Deafness, onychodystrophy, osteodystrophy, mental retardation and seizures (DOOR) syndrome, deafness, autosomal dominant, 65, Myoclonic epilepsy, infantile, familial, epileptic encephalopathy, early infantile, 16, deafness, autosomal recessive 86 |
|----|----------------|--------------------------------------------------------------------------------------------------------------------------------------------------------------------------------------------------------------------------------------------------------|

---

EE, Epileptic encephalopathy; EIEE, Early infantile epileptic encephalopathy; GEFS+, Generalized epilepsy with febrile seizure plus; FS, Febrile seizures; BFINS, Benign neonatal–infantile seizures; DNA, Deoxyribonucleic acid; DOOR, Deafness, onychodystrophy, osteodystrophy and mental retardation.
